# Supplementary material
Source: Springer Nature journal article supplement (https://www.springermedizin.de/resource/supplementary/12913_2007_449_MOESM4_ESM.pdf/9534772)

Economic US\$ per person-hour of exposure (unit cost)

\$100.00  
\$10.00  
\$1.00  
\$0.10  
\$0.01  
\$0.00

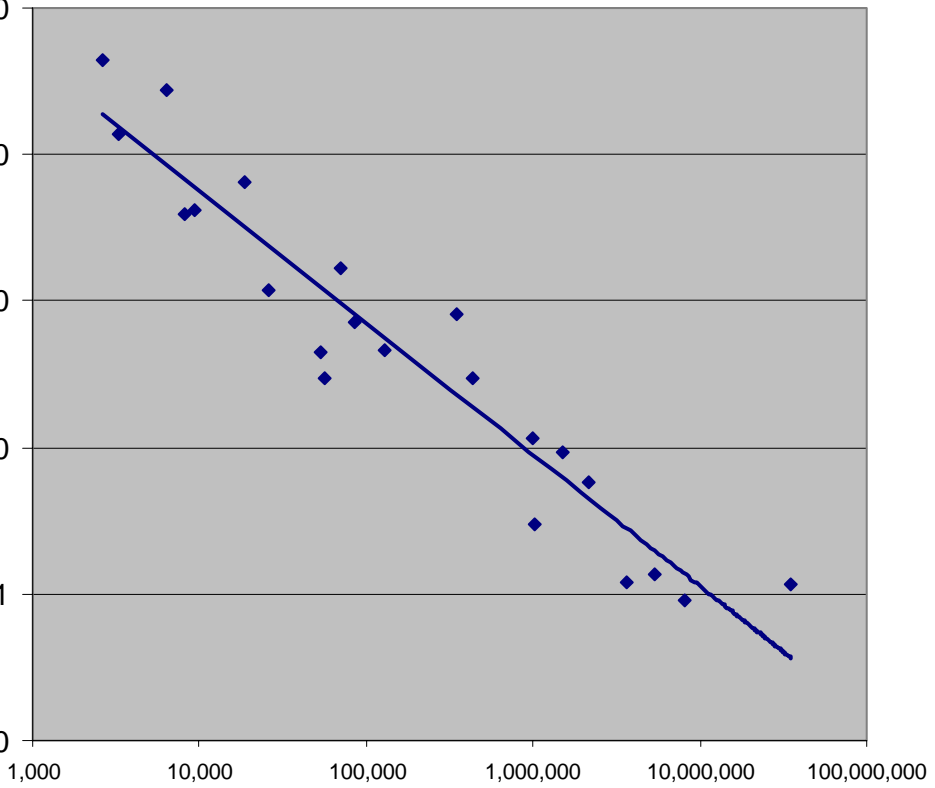

Person-hours of exposure (scale)

Supplement: MOESM4 [file 9534772]
